# Supplementary material
Source: PubMed Central journal article supplement (PMC6044612)
Supplement: ao7b00978_si_001.pdf [file ao7b00978_si_001.pdf]

# **Supporting information for**

## **Cancer Therapeutic Proficiency of Dual-Targeted Mesoporous Silica Nanocomposite Endorses Combination Drug Delivery**

Chandran Murugan<sup>1</sup>, Srinivasan Venkatesan<sup>1</sup>, and Soundarapandian Kannan<sup>1\*</sup>

1. Division of Cancer Nanomedicine Laboratory, Department of Zoology, Periyar University, Salem-636 011, Tamil Nadu, India.
2. Department of Environmental Science, Periyar University, Salem-636 011, Tamil Nadu, India.

Correspondence

**E-mail:** [sknanomedpu@gmail.com](mailto:sknanomedpu@gmail.com)

## **Table of contents**

1. The stability of PMS nanocomposite under mSerum and PBS (7.4)- page:3
2. The TPT drug molecules discharging profile at nuclear pH- page:4

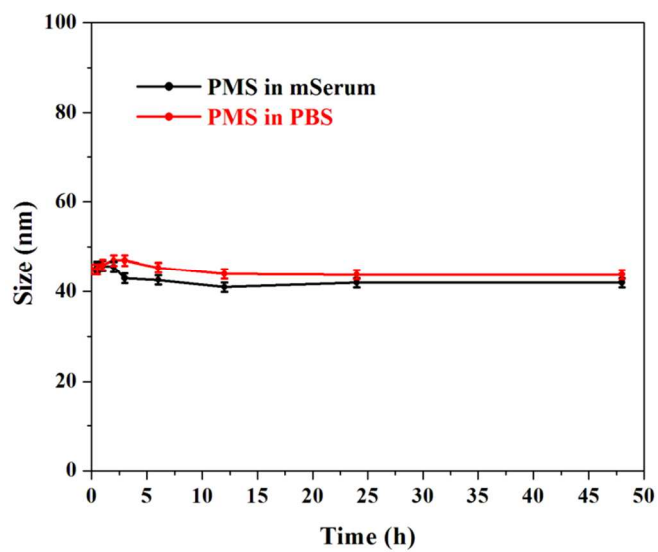

**Figure S1.** Stability of PMS nanocomposite in 10% mouse serum (mSerum) and 0.01M concentration of PBS (pH 7.4) determined by DLS at 37 °C for 48 h.

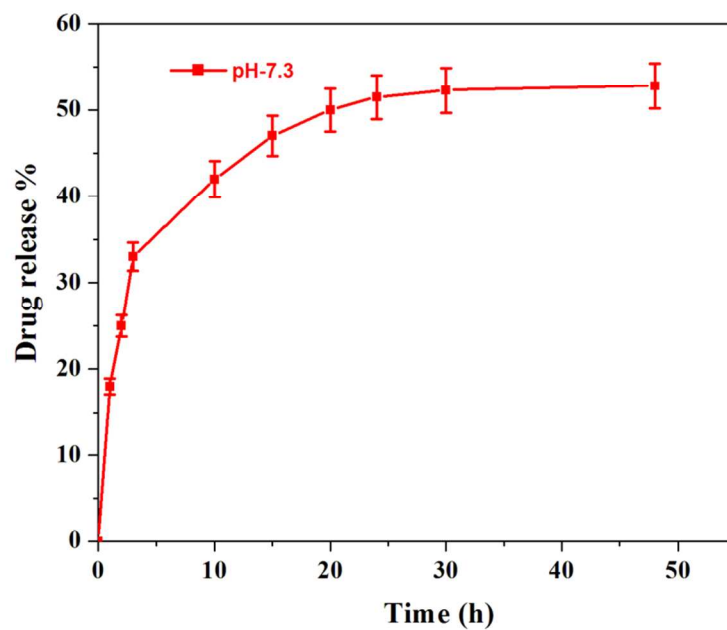

**Figure S2.** The TPT drug molecules discharging profile at nuclear pH (7.3) from TPT-MSN-TAT at incubated 37 °C for 48 h.
